# Supplementary material for: Identification of a Plasma Microrna Signature as Biomarker of Subaneurysmal Aortic Dilation in Patients with High Cardiovascular Risk
Source: PubMed Central journal article supplement (PMC7565169; doi:10.3390/jcm9092783), 2020-08-28
Supplement: jcm-09-02783-s001.pdf [file jcm-09-02783-s001.pdf]

**Table S1.** Demographic and clinical characteristics of patients with normal aortic diameter (CT), patients with ectatic aorta/subaneurysmal aortic dilations (SAD), and patients with aneurysmal aortic dilations (AAA) used for the screening experiment.

|                              | Pooled Patients       |                        |                        |
|------------------------------|-----------------------|------------------------|------------------------|
|                              | CT<br>( <i>n</i> = 6) | SAD<br>( <i>n</i> = 6) | AAA<br>( <i>n</i> = 6) |
| Age, years                   | 65 ± 3                | 67 ± 14                | 75 ± 6*                |
| Male, <i>n</i> (%)           | 3 (50)                | 5 (83,3)*              | 4 (66.6)               |
| Smoking habits, <i>n</i> (%) | 1 (20.0)              | 4 (66.6)*              | 1 (20.0)               |
| Alcohol, <i>n</i> (%)        | 1 (20.0)              | 4 (66.6)*              | 1 (20.0)               |
| Hypertension, <i>n</i> (%)   | 6 (100)               | 6 (100)                | 6 (100)                |
| Dyslipidemia, <i>n</i> (%)   | 4 (66.6)              | 4 (66.0)               | 2 (33.5)               |
| T2DM, <i>n</i> (%)           | 2 (33.3)              | 3 (50)                 | 2 (33.3)               |

Values are expressed as media ± SD for continuous variables or *n* (%) for categorical variables. \**p* < 0.05 vs. CT group. Abbreviations: T2DM: diabetes mellitus type 2.

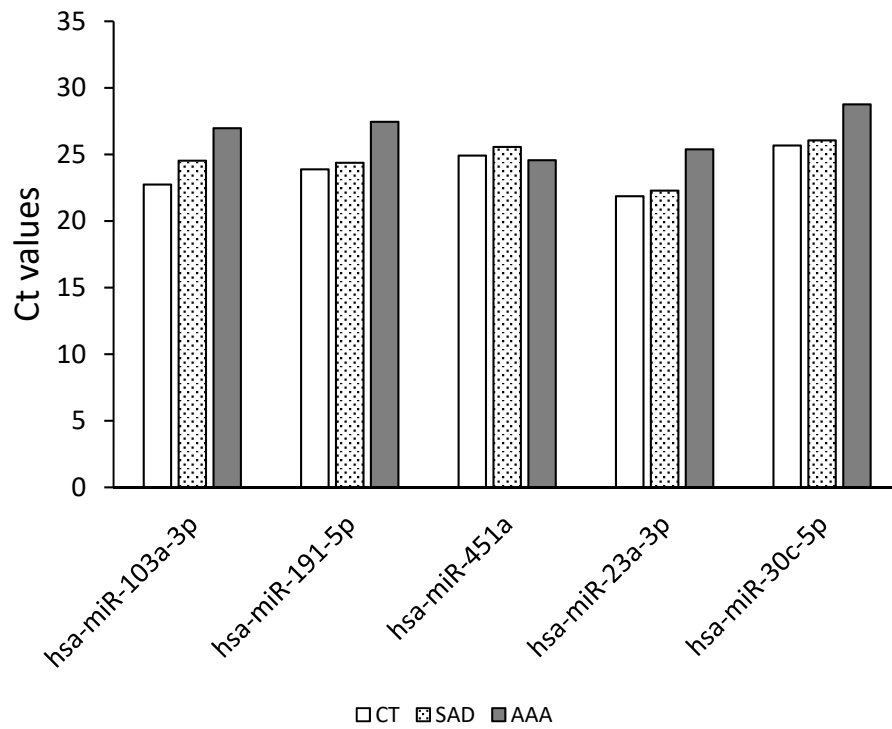

**Figure S1.** Expression levels of several miRNAs in pooled samples. We tested five candidates to reference gene, which were selected among genes that may be stably expressed in plasma/serum samples based on the literature or pre-existing data (Guidelines for the miRCURY LNA™ Universal RT microRNA PCR system, V2.0, Exiqon). MiR-451a showed to be good candidate to be a reference gene for normalization.
